# Supplementary material for: Dynamics of non-cohabiting sex partnering in sub-Saharan Africa: a modelling study with implications for HIV transmission
Source: PubMed Central journal article supplement — Sex Transm Infect. 2015 Mar 6;91(6):451–7. doi: 10.1136/sextrans-2014-051925 (PMC4552955; doi:10.1136/sextrans-2014-051925), 2015-03-06

## Supplementary Online Appendix

# Dynamics of non-cohabiting sex partnering in sub-Saharan Africa

Ryosuke Omori<sup>1,2,3</sup>, Hiam Chemaitelly<sup>2</sup> and Laith J. Abu-Raddad<sup>2,3,4</sup>

<sup>1</sup>*Division of Bioinformatics, Research Center for Zoonosis Control, Hokkaido University, Sapporo, Hokkaido, Japan*

<sup>2</sup>*Infectious Disease Epidemiology Group, Weill Cornell Medical College - Qatar, Cornell University, Qatar Foundation - Education City, Doha, Qatar*

<sup>3</sup>*Department of Healthcare Policy and Research, Weill Cornell Medical College, Cornell University, New York, New York, USA*

<sup>4</sup>*Vaccine and Infectious Disease Division, Fred Hutchinson Cancer Research Center, Seattle, Washington, USA*

Reprints or correspondence: Ryosuke Omori, PhD, Division of Bioinformatics, Research Center for Zoonosis Control, Hokkaido University. North 20, West 10, Kita-ku, Sapporo, Hokkaido, Japan. Telephone: +(81) 11-706-7307. Fax: +(81) 11-706-7310. E-mail: omori@czc.hokudai.ac.jp

## Derivation S1

We assumed that the formation or dissolution of a non-cohabiting sex partnership follows a Poisson stochastic process. We assumed that there is a fixed hazard per unit time to form a partnership,  $p_x$ . Moreover, if a partnership is formed, there is a fixed hazard per unit time for this partnership to be dissolved,  $\mu_x$ .

The equilibrium distribution for the number of partners for individual  $x$ ,  $F_x$ , is obtained using the Kolmogorov forward equation for this process. The probability that the individual  $x$  has  $m$  partners at a specific time  $t + \Delta t$ ,  $\Pr(n_x = m, t + \Delta t)$ , is described in terms of the probabilities that this individual has  $m - 1$  ( $\Pr(n_x = m - 1, t)$ ),  $m$  ( $\Pr(n_x = m, t)$ ), and  $m + 1$  ( $\Pr(n_x = m + 1, t)$ ) partners at  $t$ . It follows then, to first order in  $\Delta t$ , that

$$\begin{aligned}\Pr(n_x = m, t + \Delta t) &= (1 - m\mu_x\Delta t - p_x\Delta t)\Pr(n_x = m, t) \\ &\quad + p_x\Delta t\Pr(n_x = m - 1, t) \\ &\quad + (m + 1)\mu_x\Delta t\Pr(n_x = m + 1, t)\end{aligned}$$

$$\begin{aligned}\Pr(n_x = 0, t + \Delta t) &= (1 - p_x\Delta t)\Pr(n_x = 0, t) \\ &\quad + \mu_x\Delta t\Pr(n_x = 1, t)\end{aligned}$$

As  $\Delta t \rightarrow 0$ , we obtain the Kolmogorov differential equation:

$$\begin{aligned}\frac{d\Pr(n_x = m, t)}{dt} &= -(p_x + m\mu_x)\Pr(n_x = m, t) + p_x\Pr(n_x = m - 1, t) + (m + 1)\mu_x\Pr(n_x = m + 1, t) \\ \frac{d\Pr(n_x = 0, t)}{dt} &= -p_x\Pr(n_x = 0, t) + \mu_x\Pr(n_x = 1, t)\end{aligned}$$

Accordingly, the probability for having  $m$  partners at equilibrium is given by

$$\Pr(n_x = m)^* = \frac{\exp\left[-\frac{p_x}{\mu_x}\right]\left(\frac{p_x}{\mu_x}\right)^m}{m!}.$$

This probability mass function is equivalent to the probability mass function of a Poisson distribution with a mean of  $\frac{p_x}{\mu_x}$ . Therefore, the equilibrium distribution for the number of non-cohabiting sex partners for individual  $x$  is described by

$$F_x \equiv \text{Poisson}\left(\frac{p_x}{\mu_x}\right).$$

**Table S1:** Descriptive statistics for the reported number of non-cohabiting sex partners in the last 12 months across 25 countries in sub-Saharan Africa.

| Country               | Year    | Males    |         |          |           |       |          | Females  |         |          |           |        |          |
|-----------------------|---------|----------|---------|----------|-----------|-------|----------|----------|---------|----------|-----------|--------|----------|
|                       |         | Married  |         |          | Unmarried |       |          | Married  |         |          | Unmarried |        |          |
|                       |         | <i>n</i> | Mean    | Variance | <i>n</i>  | Mean  | Variance | <i>n</i> | Mean    | Variance | <i>n</i>  | Mean   | Variance |
| Burkina Faso          | 2010    | 4536     | 0.09830 | 0.1310   | 2761      | 0.441 | 0.562    | 13390    | 0.01410 | 0.01680  | 3694      | 0.2480 | 0.2330   |
| Burundi               | 2010    | 2423     | 0.02680 | 0.1680   | 1855      | 0.103 | 0.365    | 5259     | 0.00323 | 0.00360  | 4126      | 0.0589 | 0.0588   |
| Cameroon              | 2011    | 3618     | 0.54900 | 3.0300   | 3549      | 1.090 | 11.40    | 9792     | 0.09760 | 0.12200  | 5614      | 0.5280 | 0.7120   |
| Congo                 | 2007    | 2757     | 0.23700 | 6.9400   | 1971      | 0.796 | 2.040    | 6560     | 0.05050 | 1.48000  | 3400      | 0.4340 | 0.8280   |
| Congo-Brazzaville     | 2009    | 3062     | 0.52200 | 1.4300   | 2785      | 1.180 | 2.160    | 3943     | 0.05810 | 0.05980  | 2596      | 0.8100 | 0.9970   |
| Cote d'Ivoire         | 2012    | 2679     | 0.43100 | 1.6900   | 2446      | 1.210 | 3.740    | 6442     | 0.02790 | 0.03030  | 3597      | 0.6730 | 0.5050   |
| Ethiopia              | 2011    | 7909     | 0.00872 | 0.0132   | 6178      | 0.134 | 0.183    | 10188    | 0.01920 | 0.94600  | 6303      | 0.2300 | 14.500   |
| Ghana                 | 2003    | 2724     | 0.16600 | 0.3450   | 2286      | 0.453 | 0.712    | 3691     | 0.03500 | 0.03860  | 1997      | 0.3440 | 0.2730   |
| Guinea                | 2005    | 1877     | 0.32400 | 0.9500   | 1287      | 0.860 | 1.040    | 6313     | 0.04180 | 0.04990  | 1618      | 0.4020 | 0.3260   |
| Kenya                 | 2008-09 | 1818     | 0.07970 | 0.1050   | 1639      | 0.662 | 11.90    | 5028     | 0.00875 | 0.00868  | 3395      | 0.3170 | 0.3840   |
| Lesotho               | 2009    | 1378     | 0.32700 | 0.4380   | 1885      | 0.901 | 1.430    | 4099     | 0.08470 | 0.08920  | 3435      | 0.5210 | 2.9500   |
| Liberia               | 2007    | 3274     | 0.36000 | 0.6950   | 2653      | 0.917 | 1.390    | 4367     | 0.07650 | 0.07840  | 2532      | 0.7630 | 0.5510   |
| Malawi                | 2010    | 4196     | 0.07600 | 0.1020   | 2960      | 0.452 | 0.485    | 15423    | 0.00772 | 0.00766  | 7563      | 0.1960 | 0.2260   |
| Mali                  | 2006    | 2744     | 0.17100 | 0.8090   | 1430      | 0.382 | 1.350    | 12301    | 0.04610 | 0.05320  | 2257      | 0.1160 | 0.1350   |
| Mozambique            | 2009    | 3084     | 0.19300 | 0.2310   | 1696      | 0.785 | 0.574    | 4251     | 0.02990 | 0.03180  | 2160      | 0.4760 | 0.3750   |
| Niger                 | 2006    | 2115     | 0.02510 | 0.0538   | 1409      | 0.179 | 0.365    | 7413     | 0.00418 | 0.00444  | 1786      | 0.1060 | 5.2600   |
| Rwanda                | 2010    | 3260     | 0.04140 | 0.0465   | 3068      | 0.199 | 0.545    | 6832     | 0.00542 | 0.00539  | 6835      | 0.1230 | 1.4400   |
| Sao Tome and Principe | 2008-09 | 1177     | 0.19200 | 0.7860   | 1101      | 0.699 | 0.592    | 1740     | 0.00805 | 0.01260  | 859       | 0.3200 | 0.2460   |
| Senegal               | 2010-11 | 2158     | 0.13900 | 2.2200   | 2770      | 0.293 | 0.547    | 10804    | 0.01030 | 0.01050  | 4884      | 0.0913 | 0.0912   |
| Sierra Leone          | 2008    | 1895     | 0.26000 | 0.3400   | 1215      | 0.698 | 1.390    | 5209     | 0.04530 | 0.04440  | 1977      | 0.5580 | 0.3560   |
| Swaziland             | 2006-07 | 1265     | 0.19100 | 0.2100   | 2870      | 0.574 | 0.839    | 2067     | 0.05030 | 0.21800  | 2917      | 0.5130 | 0.2970   |
| Tanzania              | 2012    | 4329     | 0.23000 | 0.5410   | 4005      | 0.688 | 1.140    | 6816     | 0.04090 | 0.05830  | 4127      | 0.4340 | 0.3390   |
| Uganda                | 2011    | 5712     | 0.31200 | 7.8600   | 3873      | 0.562 | 6.020    | 7626     | 0.05060 | 1.31000  | 4523      | 0.2920 | 0.2550   |
| Zambia                | 2007    | 3618     | 0.15600 | 0.2230   | 2864      | 0.571 | 0.914    | 4314     | 0.00719 | 0.00760  | 2828      | 0.3370 | 0.2650   |
| Zimbabwe              | 2011    | 3747     | 0.24400 | 7.8100   | 3635      | 0.462 | 1.340    | 5518     | 0.01090 | 0.01870  | 3537      | 0.2410 | 1.1300   |

\**n* denotes the sample size; mean and variance denote the mean and variance of the reported number of non-cohabiting sex partners in the last 12 months as reported in the cross-sectional Demographic and Health Survey.

**Figure S1:** Comparison of model-predicted distributions and empirical distributions for married males. Distribution of the number of non-cohabiting sex partners over the last 12 months among married males across the 25 studied countries in sub-Saharan Africa. The blue line shows the model-predicted distribution while the red line shows the empirical distribution per the Demographic and Health Survey data.

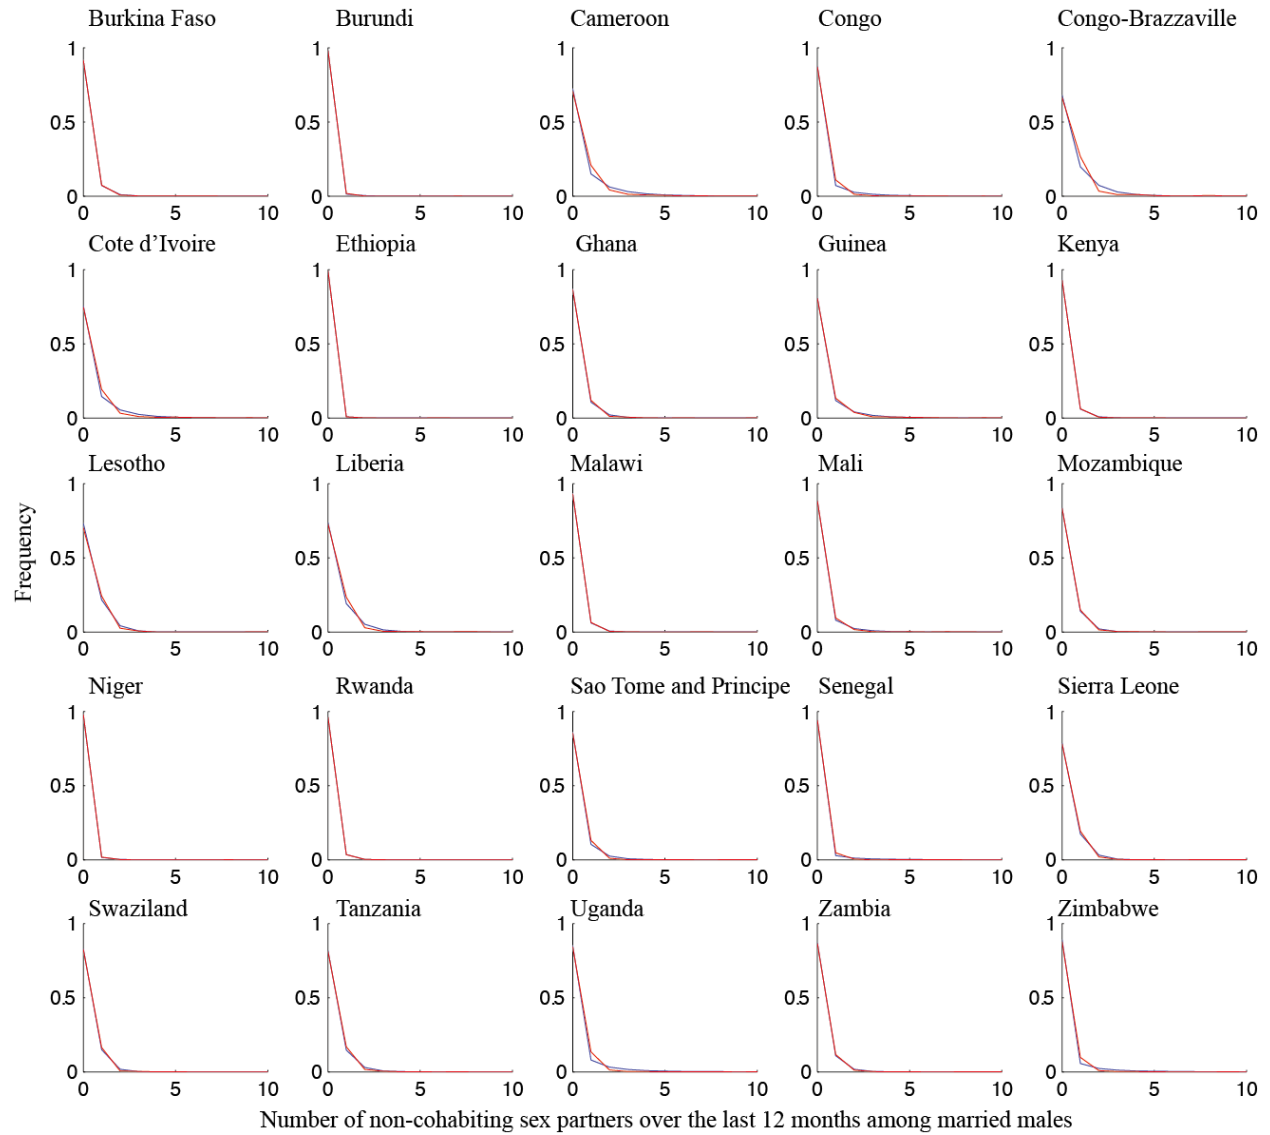

**Figure S2:** Comparison of model-predicted distributions and empirical distributions for unmarried males. Distribution of the number of non-cohabiting sex partners over the last 12 months among unmarried males across the 25 studied countries in sub-Saharan Africa. The blue line shows the model-predicted distribution while the red line shows the empirical distribution per the Demographic and Health Survey data.

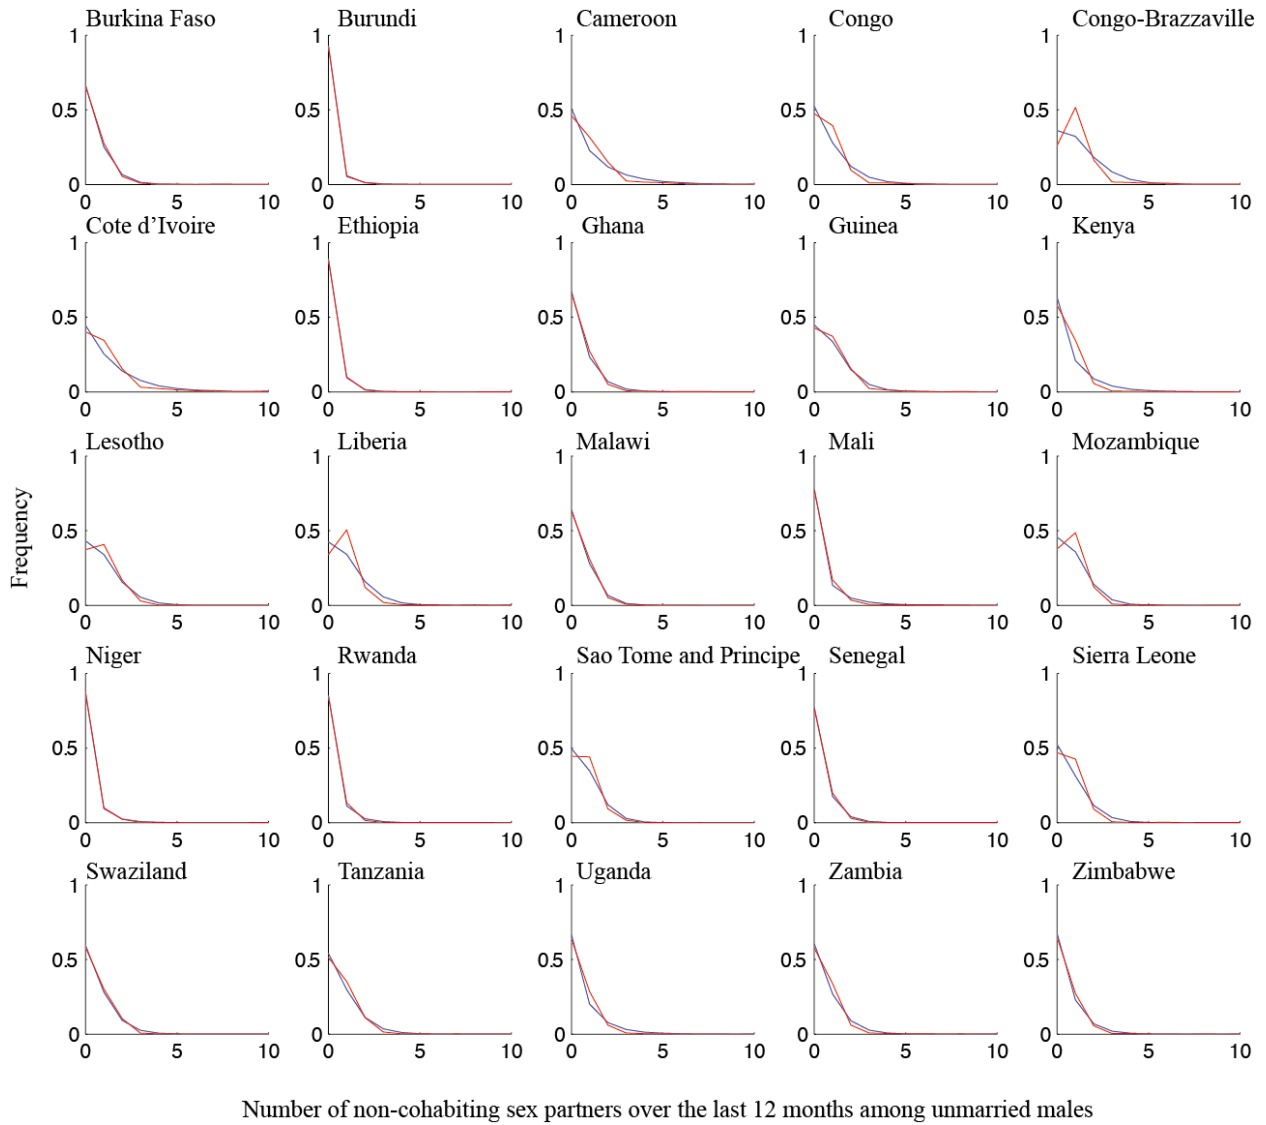

**Figure S3:** Comparison of model-predicted distributions and empirical distributions for married females. Distribution of the number of non-cohabiting sex partners over the last 12 months among married females across the 25 studied countries in sub-Saharan Africa. The blue line shows the model-predicted distribution while the red line shows the empirical distribution per the Demographic and Health Survey data.

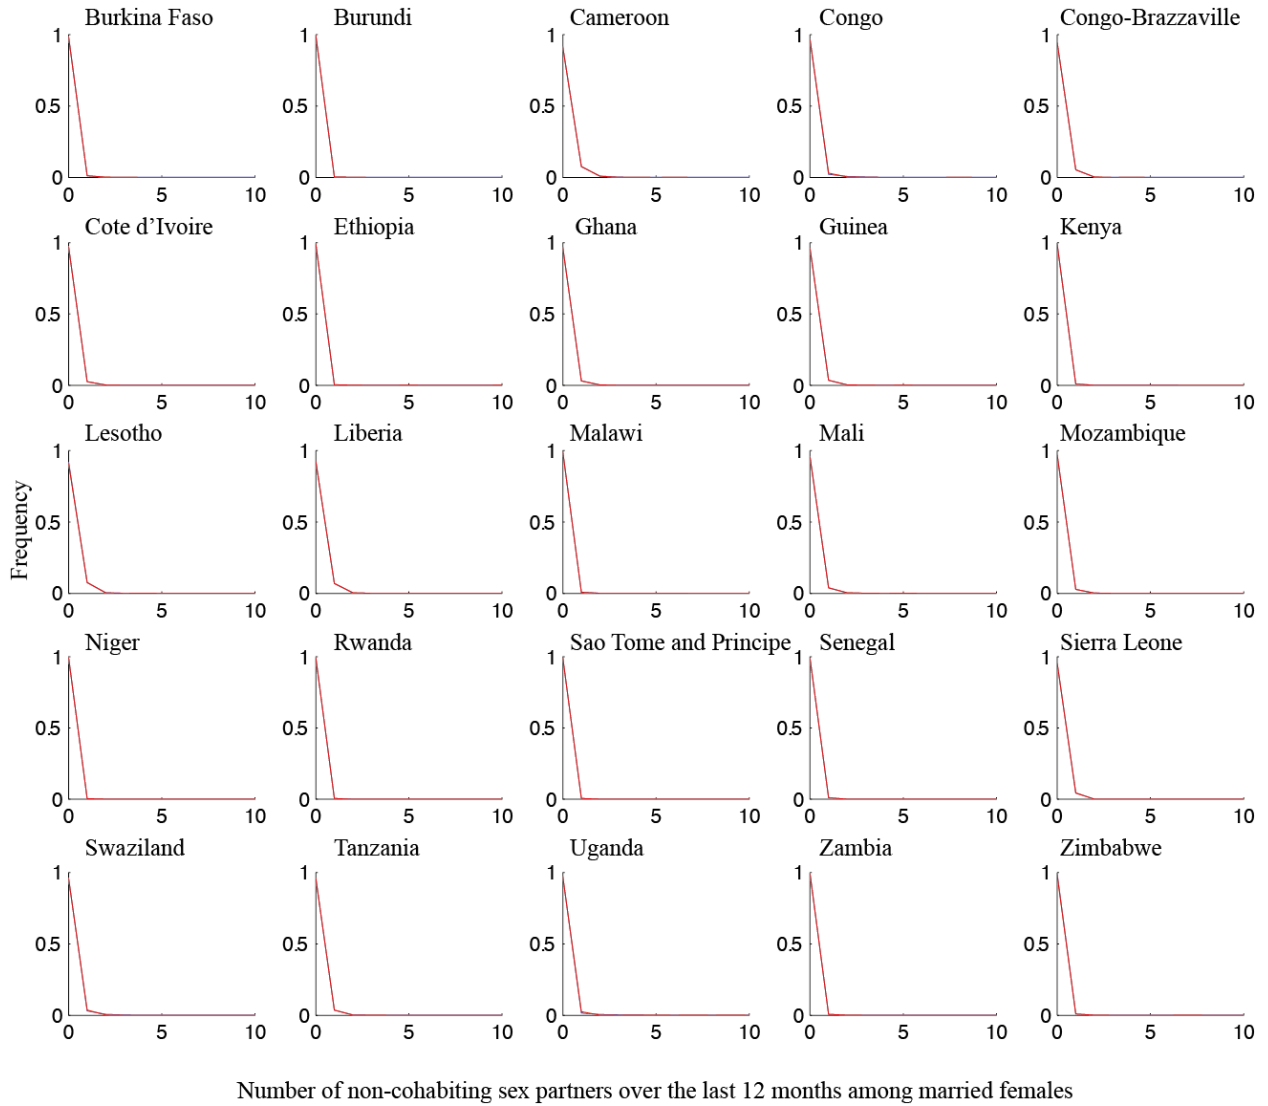

**Figure S4:** Comparison of model-predicted distributions and empirical distributions for unmarried females. Distribution of the number of non-cohabiting sex partners over the last 12 months among unmarried females across the 25 studied countries in sub-Saharan Africa. The blue line shows the model-predicted distribution while the red line shows the empirical distribution per the Demographic and Health Survey data.

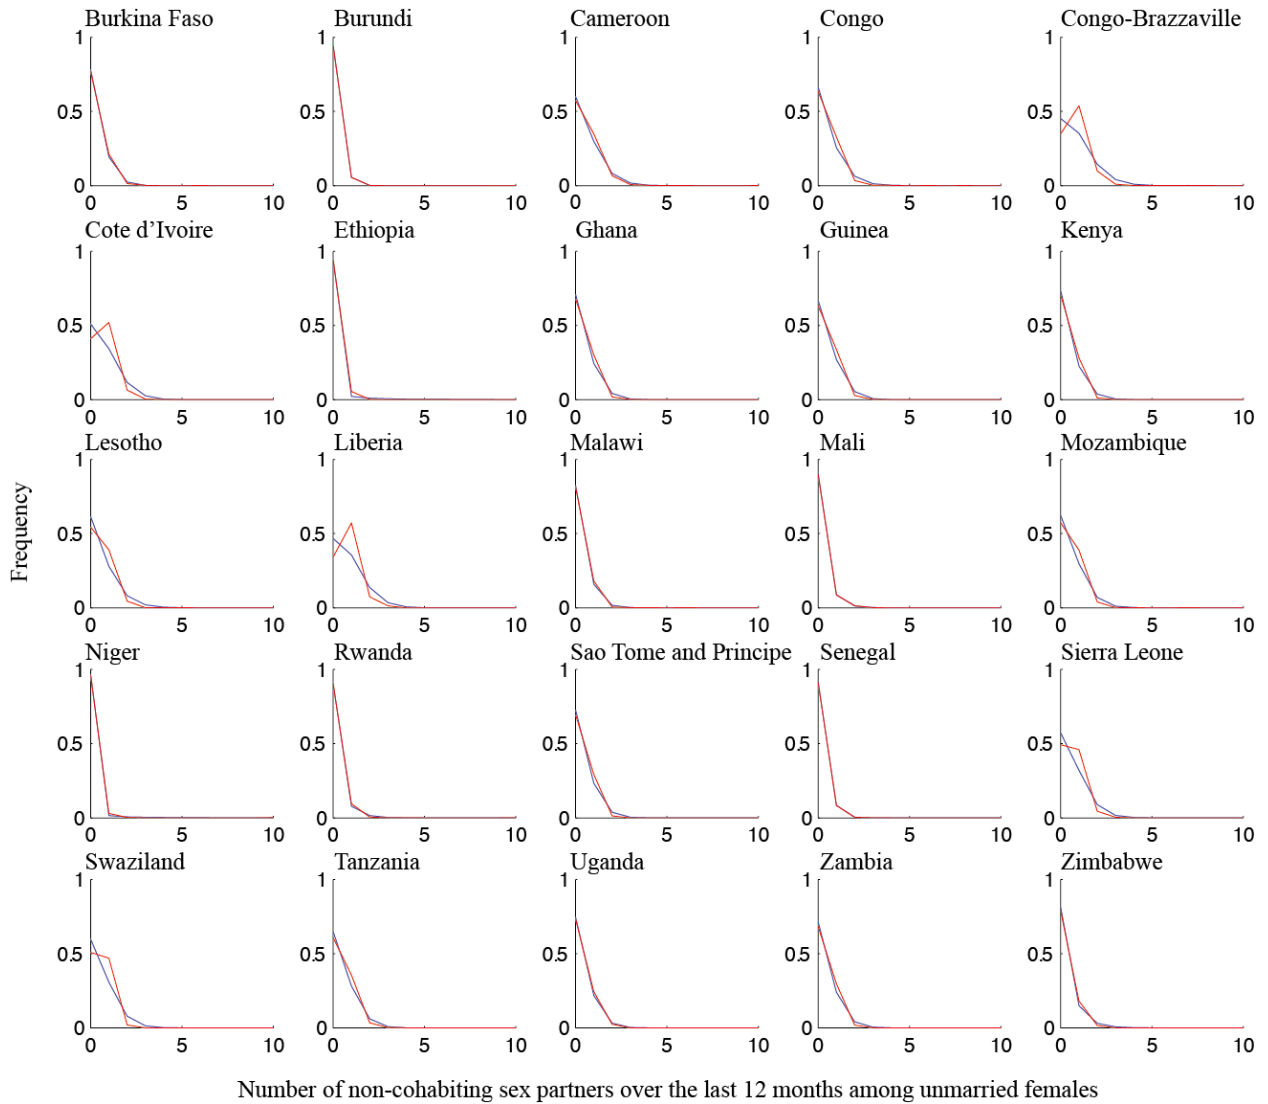

Supplement: sextrans-2014-051925-s1.pdf [file sextrans-2014-051925-s1.pdf]
